# Supplementary material
Source: Springer Nature journal article supplement (https://www.springermedizin.de/resource/supplementary/12960_2009_221_MOESM1_ESM.pdf/9570676)
Supplement: MOESM1 [file 9570676]

### Sex: EX2002

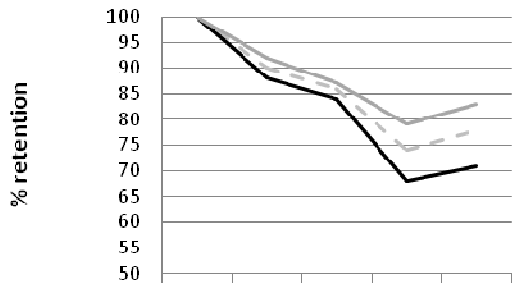

|           | 1st | 2nd | 3rd | 4th | 5th |
|-----------|-----|-----|-----|-----|-----|
| --- total | 100 | 90  | 86  | 74  | 78  |
| — male    | 100 | 88  | 84  | 68  | 71  |
| — female  | 100 | 92  | 87  | 79  | 83  |

### Age: EX2002

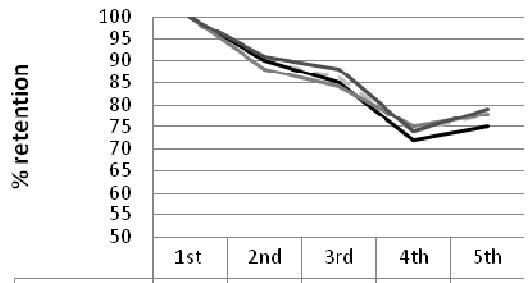

|           | 1st | 2nd | 3rd | 4th | 5th |
|-----------|-----|-----|-----|-----|-----|
| --- total | 100 | 90  | 86  | 74  | 78  |
| — <30     | 100 | 90  | 85  | 72  | 75  |
| — 30-39   | 100 | 88  | 84  | 75  | 78  |
| — >40     | 100 | 91  | 88  | 74  | 79  |

### Country of birth, Sweden: EX2002

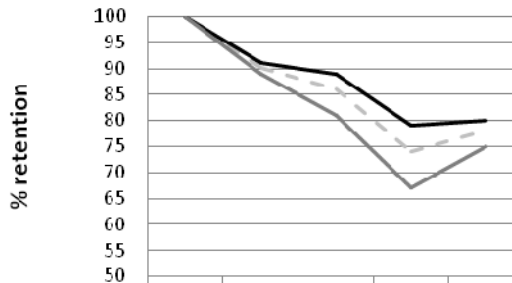

|           | 1st | 2nd | 3rd | 4th | 5th |
|-----------|-----|-----|-----|-----|-----|
| --- total | 100 | 90  | 86  | 74  | 78  |
| — yes     | 100 | 91  | 89  | 79  | 80  |
| — no      | 100 | 89  | 81  | 67  | 75  |

### Cohabiting: EX2002

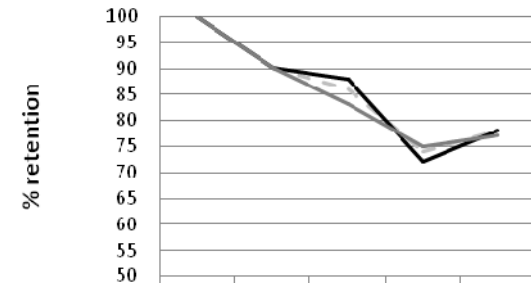

|           | 1st | 2nd | 3rd | 4th | 5th |
|-----------|-----|-----|-----|-----|-----|
| --- total | 100 | 90  | 86  | 74  | 78  |
| — yes     | 100 | 90  | 88  | 72  | 78  |
| — no      | 100 | 90  | 83  | 75  | 77  |

### Self-rated health: EX2002

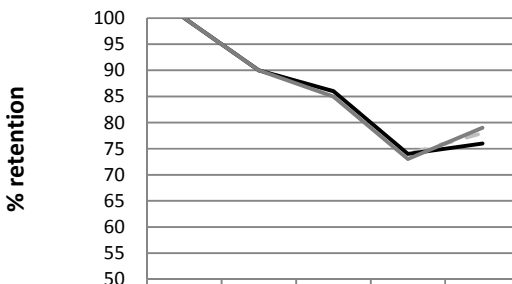

|           | 1st | 2nd | 3rd | 4th | 5th |
|-----------|-----|-----|-----|-----|-----|
| --- total | 100 | 90  | 86  | 74  | 78  |
| — good    | 100 | 90  | 86  | 74  | 76  |
| — poor    | 100 | 90  | 85  | 73  | 79  |
